# Supplementary material
Source: PubMed Central journal article supplement (PMC5985225)
Supplement: NIHMS964493-supplement-Suppl_1.pdf [file NIHMS964493-supplement-Suppl_1.pdf]

# Quantification of Intramyocardial Blood Volume with $^{99m}\text{Tc}$ -RBC SPECT-CT Imaging – A Preclinical Study

Hassan Mohy-ud-Din, PhD\*, Nabil E. Boutagy, PhD, John C. Stendahl, MD, PhD, Zhen W. Zhuang, MD, Albert J. Sinusas, MD, Chi Liu, PhD

Yale University, New Haven, CT, USA

\*[hassanmohyuddin@skm.org.pk](mailto:hassanmohyuddin@skm.org.pk), [mohyuddin.engineer@gmail.com](mailto:mohyuddin.engineer@gmail.com)

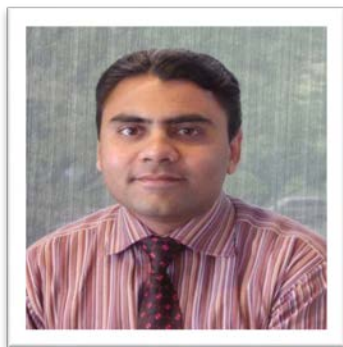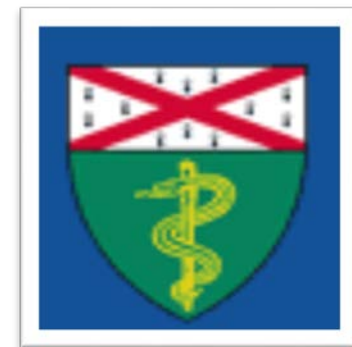

# BACKGROUND

- 1 – Ischemic heart disease (IHD) has a **high mortality rate** [1] and can be attributed to obstructive coronary artery disease (CAD) and/or coronary microvascular disease (CMD).
- 2 – CMD is characterized by structural and functional impairments of the coronary microcirculation ( $< 500 \mu m$ ), while CAD affects the larger diameter epicardial arteries.
- 3 – CMD exists in a large proportion of patients with IHD and other cardiovascular diseases (i.e. **hypertrophic heart disease, aortic stenosis**) and may occur in individuals with and without CAD [2 – 4].
- 4 – Many risk factors have been proposed to contribute to CMD, such as **chronic inflammation, insulin resistance, obesity, and chemotherapy and radiation therapy** [5 – 8].
- 5 – **LVEF** has **limited sensitivity** [9], **late manifestation** [10], and **large variability** [11].
- 6 – **Concern:** No established non-invasive imaging approach to directly evaluate myocardial microcirculatory function to diagnose MVD independent of co-existing epicardial disease.
- 7 – **Prior Knowledge:** Microcirculation damage precedes changes in myocardial contraction and deformation (i.e. LVEF drop) [12].
- 8 – **Proposed Approach:** A methodological framework for absolute quantification of intramyocardial blood volume (IMBV) as a novel index of microcirculatory function with SPECT/CT imaging of  $^{99m}\text{Tc}$ -RBCs.

# METHODS

## Study Type

- Prospective preclinical imaging studies were performed under resting conditions with a dedicated cardiac hybrid SPECT/CT system.

## Study Subjects

- Twelve retired female beagle breeders (weight  $10.8 \pm 1.0$  kg) were scanned during this project.  $^{99m}\text{Tc}$ -labeled RBCs ( $18.8 \pm 4.3$  mCi) were intravenously injected into the animal and allowed to recirculate for 15 minutes before initiation of equilibrium blood pool SPECT imaging (~10 minutes acquisition).

## Study Endpoints

- **Primary Endpoints:**
  - (1) Robust estimation of IMBV *in vivo* with SPECT-CT imaging, and
  - (2) Validation of *in vivo* estimates of IMBV with those obtained from *ex vivo* microCT imaging following vascular casting under physiological pressures.
- **Secondary Endpoint:** Impact of various correction schemes on quantification of IMBV.

## Study Variables

- IMBV in the end-diastolic and end-systolic phases of the cardiac cycle.

## RESULTS – I

**Table 1:** IMBV at end-diastolic and end-systolic phases using various correction schemes. Each approach was compared (paired  $t$  test) to the reference fully corrected dataset (**DG + AC + SC + PVC**) presumed to be the best estimate.  $P < 0.05$  was considered statistically significant.

| (N = 12)                  | IMBV                        |                             |
|---------------------------|-----------------------------|-----------------------------|
|                           | End-Diastolic Phase         | End-Systolic Phase          |
| <b>CG</b>                 | 0.25 ± 0.04 ( $P < 0.002$ ) | 0.21 ± 0.04 ( $P < 0.002$ ) |
| <b>CG + AC</b>            | 0.25 ± 0.03 ( $P < 0.002$ ) | 0.21 ± 0.03 ( $P < 0.002$ ) |
| <b>CG + AC + SC</b>       | 0.21 ± 0.03 ( $P < 0.002$ ) | 0.17 ± 0.03 ( $P < 0.002$ ) |
| <b>DG + AC + SC</b>       | 0.21 ± 0.04 ( $P < 0.002$ ) | 0.17 ± 0.03 ( $P < 0.002$ ) |
| <b>DG + AC + SC + PVC</b> | 0.15 ± 0.03                 | 0.11 ± 0.03                 |

*CG – Cardiac gating only with no other physical corrections*  
*CG + AC – Cardiac gating with attenuation correction*  
*CG + AC + SC – Cardiac gating with attenuation and scatter correction*  
*DG + AC + SC – Dual cardiac and respiratory gating, attenuation and scatter correction*  
*DG + AC + SC + PVC – Dual-gating, attenuation, scatter, and partial volume correction*  
*IMBV – Intramyocardial blood volume*  
*Data is represented as  $\mu \pm \sigma$  ( $P$  – value)*

## RESULTS – II

**Figure 1:** Correlation plots between IMBV values derived from in vivo SPECT and ex vivo microCT imaging for various correction schemes. Plots also display Pearson correlation-value squared ( $R^2$ ), and the slope/intercept of linear regression fit. Green line is the line of identity. Fully corrected dataset (**DG + AC + SC + PVC**) resulted in the least overestimation (minimum bias) compared to no correction or partial correction schemes.

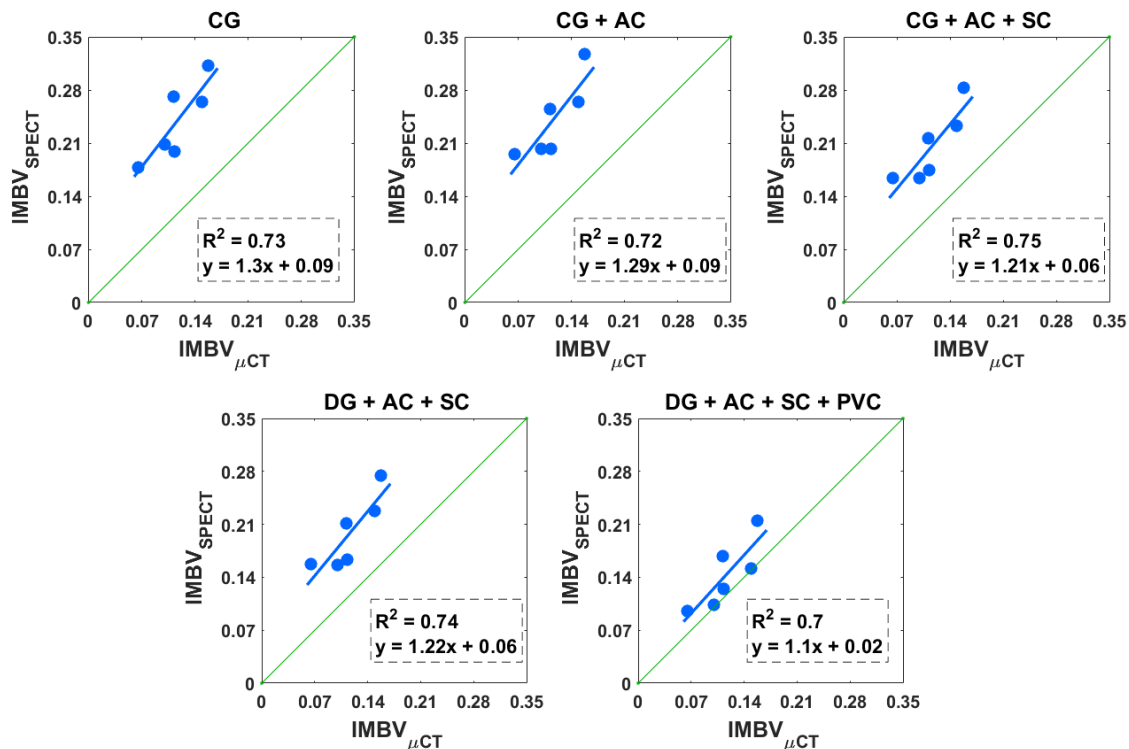

## CONCLUSIONS

- 1 – **Full correction scheme** resulted in an IMBV of  $0.15 \pm 0.03$  in the end-diastolic phase. Literature reports values in the range 0.06 – 0.20 for *in vivo* imaging studies [13 – 15] and 0.05 – 0.14 for *ex vivo* validation assays [15 – 19].
- 2 – Cycle-dependent changes in IMBV (~23%) are consistent with what is reported in the literature (i.e. 20 – 25%) [13, 20].
- 3 – Schemes that applied no correction or partial correction resulted in significant over-estimation of IMBV ( $P < 0.002$ ).
- 4 – *In vivo* SPECT estimates of IMBV strongly correlated ( $R^2 \geq 0.70$ ) with *ex vivo* measures for various correction schemes, while the **fully corrected scheme** yielded the smallest bias.
- 5 – While the correlations are high, SPECT derived IMBV values are generally higher than microCT derived values. This discrepancy may be caused by the resolution limit of the microCT scan (~25  $\mu\text{m}$ ), leading to smaller vessels being excluded from segmentation and a potential underestimation of IMBV.
- 6 – Accurate quantification of IMBV requires the use of anatomical information from adjunctive contrast CT imaging and corrections for cardiorespiratory motion, attenuation, scatter, and partial volume effects.

## REFERENCES

- [1] Association AH. Heart Disease and Stroke Statistics – At-a-Glance; 2015.
- [2] Qian, J. et al., Herz 1999; 24:548-57.
- [3] Fearon WF. Letter by Fearon regarding article, Circulation 2011;123:e212; author reply e3.
- [4] Lanza, G.A. et al., Circulation 2010; 121:2317-25.
- [5] Recio-Mayoral, A. et al., European Heart Journal 2009: ehp205.
- [6] Camici, P.G. et al., The new England journal of medicine 2007; 356:830-40.
- [7] Selthofer-Relatić, K. et al., Cardiology research and practice 2016; 2016.
- [8] Gallucci, G. et al., Tumori 2008; 94:129-33.
- [9] Ewer, M.S., et al., Journal of Clinical Oncology, 1984. 2(2): p. 112-117.
- [10] Jiji, R.S., et al., Journal of Nuclear Cardiology, 2012. 19(2): p. 377-388.
- [11] Galema, T.W., et al. European Heart Journal-Cardiovascular Imaging 9.2 (2008): 250-254.
- [12] Daher, I.N. et al., Nature Clin. Practice Cardiovascular Medicine, 2008. 5(12): p. 797-805.
- [13] Liu Y, et al., Am J Physiol-Heart C 1992; 263:H963-H7.
- [14] Wu X, et al., Circulation 1992; 85:730-7.
- [15] McCommis K.S., et al., Journal of the Society for CMR 2007; 9:785-92.
- [16] Morgenstern C, et al., Pflügers Archiv 1973; 340:101-11.
- [17] Kassab G.S., et al., Am J Physiol-Heart C 1994; 267:H2100-H13.
- [18] Hoffman E, et al., Activation, metabolism and perfusion of the heart; 1987. p. 421-32.
- [19] Spaan J. Circulation research 1985; 56:293-309.
- [20] Pascotto M, et al., Heart 2007; 93:438-43.
